# Supplementary material for: Left Atrial Appendage Thrombosis and Oral Anticoagulants: A Meta-Analysis of Risk and Treatment Response
Source: MDPI journal article supplement (doi:10.3390/jcdd9100351), 2022-10-13
Supplement: s1 [file s1]

Table S1 Search history and results

| Database                                                                                 | No. of query | Search terms                                                                                                                                                                                                                                                                                                                                                                                                                                                                                                                                                                                     | Results |
|------------------------------------------------------------------------------------------|--------------|--------------------------------------------------------------------------------------------------------------------------------------------------------------------------------------------------------------------------------------------------------------------------------------------------------------------------------------------------------------------------------------------------------------------------------------------------------------------------------------------------------------------------------------------------------------------------------------------------|---------|
| Pubmed<br>Final Search Date:<br>2022/07/31                                               | 1            | ((((((((((warfarin[Title/Abstract]) OR (novel oral anticoagulant[Title/Abstract])) OR (oral anticoagulant[Title/Abstract])) OR (anticoagulant[Title/Abstract])) OR (direct oral anticoagulant[Title/Abstract])) OR (vitamin K anticoagulant[Title/Abstract])) OR (non-vitamin K oral anticoagulant[Title/Abstract])) OR (dabigatran[Title/Abstract])) OR (rivaroxaban[Title/Abstract])) OR (apixaban[Title/Abstract])) OR (edoxaban[Title/Abstract]) AND ((left atrial appendage thrombus[Title/Abstract]) OR (left atrial thrombus[Title/Abstract])) AND (atrial fibrillation[Title/Abstract])) | 186     |
| EMBASE<br>Final Search Date:<br>2022/07/31                                               | 1            | ('warfarin'/exp OR 'warfarin' OR 'novel oral anticoagulant'/exp OR 'novel oral anticoagulant' OR 'oral anticoagulant'/exp OR 'oral anticoagulant' OR 'anticoagulant'/exp OR 'anticoagulant' OR 'direct oral anticoagulant'/exp OR 'direct oral anticoagulant' OR 'vitamin k anticoagulant' OR 'non-vitamin k oral anticoagulant' OR 'dabigatran'/exp OR 'dabigatran' OR 'rivaroxaban'/exp OR 'rivaroxaban' OR 'apixaban'/exp OR 'apixaban' OR 'edoxaban'/exp OR 'edoxaban') AND ('left atrial appendage thrombus':ab,ti OR 'left atrial thrombus':ab,ti) AND 'atrial fibrillation':ab,ti         | 581     |
|                                                                                          | 2            | #1 AND ('Article'/it OR 'Article in Press'/it OR 'Conference Paper'/it)                                                                                                                                                                                                                                                                                                                                                                                                                                                                                                                          | 312     |
| Cochrane Central<br>Register of<br>Controlled Trials<br>Final Search Date:<br>2022/07/31 | 1            | 'left atrial appendage thrombus' OR 'left atrial thrombus' in Title Abstract Keyword AND 'atrial fibrillation' in Title Abstract Keyword AND 'warfarin' OR 'novel oral anticoagulant' OR 'oral anticoagulant' OR 'anticoagulant' OR 'direct oral anticoagulant' OR 'vitamin k anticoagulant' OR 'non-vitamin k oral anticoagulant' OR 'dabigatran' OR 'rivaroxaban' OR 'apixaban' OR 'edoxaban' in Title Abstract Keyword                                                                                                                                                                        | 118     |
| Google Scholar                                                                           | 1            | ((((((((((warfarin[Title/Abstract]) OR (novel oral                                                                                                                                                                                                                                                                                                                                                                                                                                                                                                                                               | 189     |

|                                  |  |                                                                                                                                                                                                                                                                                                                                                                                                                                                                                                                                                                                  |  |
|----------------------------------|--|----------------------------------------------------------------------------------------------------------------------------------------------------------------------------------------------------------------------------------------------------------------------------------------------------------------------------------------------------------------------------------------------------------------------------------------------------------------------------------------------------------------------------------------------------------------------------------|--|
| Final Search Date:<br>2022/07/31 |  | anticoagulant[Title/Abstract])) OR (oral<br>anticoagulant[Title/Abstract])) OR<br>(anticoagulant[Title/Abstract])) OR (direct oral<br>anticoagulant[Title/Abstract])) OR (vitamin K<br>anticoagulant[Title/Abstract])) OR (non-vitamin K oral<br>anticoagulant[Title/Abstract])) OR<br>(dabigatran[Title/Abstract])) OR<br>(rivaroxaban[Title/Abstract])) OR<br>(apixaban[Title/Abstract])) OR<br>(edoxaban[Title/Abstract]) AND ((left atrial appendage<br>thrombus[Title/Abstract]) OR (left atrial<br>thrombus[Title/Abstract])) AND (atrial<br>fibrillation[Title/Abstract]) |  |
|----------------------------------|--|----------------------------------------------------------------------------------------------------------------------------------------------------------------------------------------------------------------------------------------------------------------------------------------------------------------------------------------------------------------------------------------------------------------------------------------------------------------------------------------------------------------------------------------------------------------------------------|--|
